# Supplementary material for: Mother’s education and the risk of several neonatal outcomes: an evidence from an Italian population-based study
Source: Springer Nature journal article supplement (doi:10.1186/s12884-017-1418-1), 2017-07-12
Supplement: MOESM1 [file 13298748]

## Additional file

**Table S1.** Chronic maternal medical conditions were defined from inpatient diagnoses using ICD-9 code. They were measured from 2 years pre-LMP (last menstrual period) through to the end of the delivery.

| <b>Condition</b>    |                               | <b>ICD-9 codes</b>                         |
|---------------------|-------------------------------|--------------------------------------------|
| <b>Hypertension</b> | Pre-existing hypertension     | 401.x-405.x, 642.0x-642.2x, 642.7x, 642.9x |
|                     | Gestational hypertension      | 642.3x                                     |
| <b>Preeclampsia</b> | Mild preeclampsia             | 642.4x                                     |
|                     | Severe preeclampsia           | 642.5x, 642.6x, 642.7x                     |
| <b>Diabetes</b>     | Pre-gestational diabetes      | 250.x, 648.0x                              |
|                     | Gestational diabetes          | 648.8x                                     |
| <b>Dyslipidemia</b> | Disorders of lipid metabolism | 272.x                                      |

**Table S2.** Neonatal outcomes within two years after birth, defined from hospital discharge database

**Severe congenital anomalies** – EUROCAT classification, [www.eurocat-network.eu](http://www.eurocat-network.eu)

| <b>Condition</b>         | <b>ICD-9 code</b>                                  |
|--------------------------|----------------------------------------------------|
| Nervous system           | 740, 741, 742                                      |
| Eye                      | 743                                                |
| Ear, face and neck       | 744                                                |
| Congenital heart defects | 745, 746, 747.0 – 747.4                            |
| Respiratory              | 748.0, 748.4, 748.50, 748.52, 748.58, 748.6, 748.8 |
| Oro-facial clefts        | 749.0, 749.1, 749.2                                |
| Digestive system         | 750, 751, 756.6                                    |
| Abdominal wall defects   | 756.71, 756.70, 756.79                             |
| Urinary                  | 752.61, 753, 756.72                                |
| Genital                  | 752.0 – 752.4, 752.60, 752.62, 752.7 – 752.9       |
| Limb                     | 754.3 – 754.8, 755                                 |

### Signs of cerebral distress

| <b>Condition</b>                                             | <b>ICD-9 code</b> |
|--------------------------------------------------------------|-------------------|
| Convulsions in newborn                                       | 779.0             |
| Other and unspecified cerebral irritability in newborn       | 779.1             |
| Cerebral depression, coma, and other abnormal cerebral signs | 779.2             |

### Distress of respiratory function

| <b>Condition</b>                                   | <b>ICD-9 code</b> |
|----------------------------------------------------|-------------------|
| Intrauterine hypoxia and birth asphyxia            | 768               |
| Other respiratory conditions of foetus and newborn | 770               |
